# Supplementary material for: Characterization of a novel cell penetrating peptide derived from human Oct4
Source: PubMed Central journal article supplement (PMC4230757; doi:10.1186/2045-9769-3-2), 2014-01-31

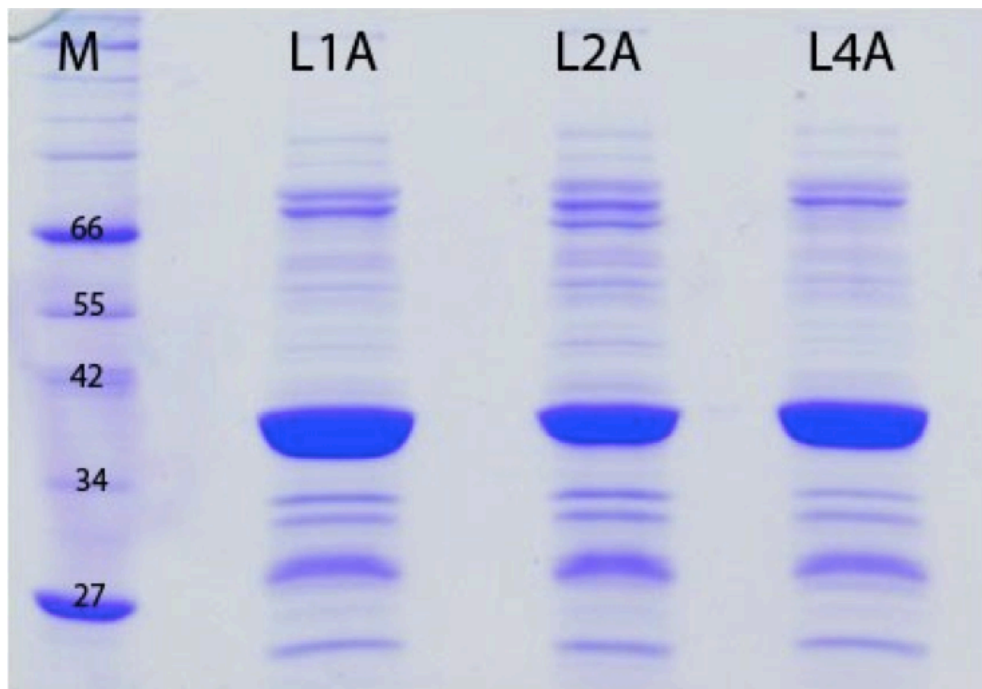

Supplement: 13619_2013_17_MOESM2_ESM.pdf [file 13619_2013_17_MOESM2_ESM.pdf]
